# Supplementary material for: Dendritic Cell Density and Morphology Can Be Used to Differentiate Vernal Keratoconjunctivitis from Allergic Conjunctivitis
Source: MDPI journal article supplement (doi:10.3390/biom13101469), 2023-09-29
Supplement: s1 [file s1]

Supplementary TableS1: Association between dendritic cell density/ morphology and ocular surface symptoms/ signs examined using Spearman correlation and Mann-Whitney U test as appropriate in 60 participants with VKC, AC, and non-allergic. All 5 locations were included, therefore the level of significance was set at  $p < 0.01$  (adjusted for multiple comparisons).

|                                 | Density                  | DC morphology            |                       |                            |                             |
|---------------------------------|--------------------------|--------------------------|-----------------------|----------------------------|-----------------------------|
|                                 |                          | Cell body size           | Presence of dendrites | Presence of long dendrites | Presence of thick dendrites |
| Dryness                         | $\rho=0.17$<br>$p=0.003$ | $\rho=0.19$<br>$p=0.001$ | $p=0.17$              | $p=0.001$                  | $p=0.25$                    |
| Itchiness                       | $\rho=0.35$<br>$p=0.001$ | $\rho=0.33$<br>$p=0.001$ | $p=0.001$             | $p=0.001$                  | $p=0.05$                    |
| Burning                         | $\rho=0.33$<br>$p=0.001$ | $\rho=0.32$<br>$p=0.001$ | $p=0.001$             | $p=0.001$                  | $p=0.03$                    |
| Stinging                        | $\rho=0.40$<br>$p=0.001$ | $\rho=0.38$<br>$p=0.001$ | $p=0.001$             | $p=0.001$                  | $p=0.012$                   |
| Watering                        | $\rho=0.35$<br>$p=0.001$ | $\rho=0.28$<br>$p=0.001$ | $p=0.001$             | $p=0.001$                  | $p=0.02$                    |
| Redness                         | $\rho=0.38$<br>$p=0.001$ | $\rho=0.36$<br>$p=0.001$ | $p=0.001$             | $p=0.001$                  | $p=0.013$                   |
| A need to rub eyes              | $\rho=0.39$<br>$p=0.001$ | $\rho=0.36$<br>$p=0.001$ | $p=0.001$             | $p=0.001$                  | $p=0.03$                    |
| AUAQ, Total symptom score       | $\rho=0.37$<br>$p=0.001$ | $\rho=0.34$<br>$p=0.001$ | $p=0.001$             | $p=0.001$                  | $p=0.012$                   |
| Limbal redness                  | $\rho=0.39$<br>$p=0.001$ | $\rho=0.38$<br>$p=0.001$ | $p=0.001$             | $p=0.001$                  | $p=0.02$                    |
| Bulbar redness                  | $\rho=0.40$<br>$p=0.001$ | $\rho=0.38$<br>$p=0.001$ | $p=0.001$             | $p=0.001$                  | $p=0.02$                    |
| Palpebral redness               | $\rho=0.38$<br>$p=0.001$ | $\rho=0.37$<br>$p=0.001$ | $p=0.001$             | $p=0.001$                  | $p=0.02$                    |
| Corneal epithelial disorders    | $\rho=0.31$<br>$p=0.001$ | $\rho=0.31$<br>$p=0.001$ | $p=0.002$             | $p=0.001$                  | $p=0.009$                   |
| Bulbar conjunctival chemosis    | $\rho=0.34$<br>$p=0.001$ | $\rho=0.34$<br>$p=0.001$ | $p=0.001$             | $p=0.001$                  | $p=0.002$                   |
| Palpebral conjunctival papillae | $\rho=0.30$<br>$p=0.001$ | $\rho=0.32$<br>$p=0.001$ | $p=0.003$             | $p=0.001$                  | $p=0.03$                    |
| Palpebral conjunctival follicle | $\rho=0.23$<br>$p=0.001$ | $\rho=0.18$<br>$p=0.003$ | $p=0.04$              | $p=0.001$                  | $p=0.85$                    |
